# Supplementary material for: Bacterial superinfection pneumonia in SARS-CoV-2 respiratory failure
Source: bioRxiv or medRxiv preprint supplement (doi:10.1101/2021.01.12.20248588), 2021-01-15

# New Episodes of VAP

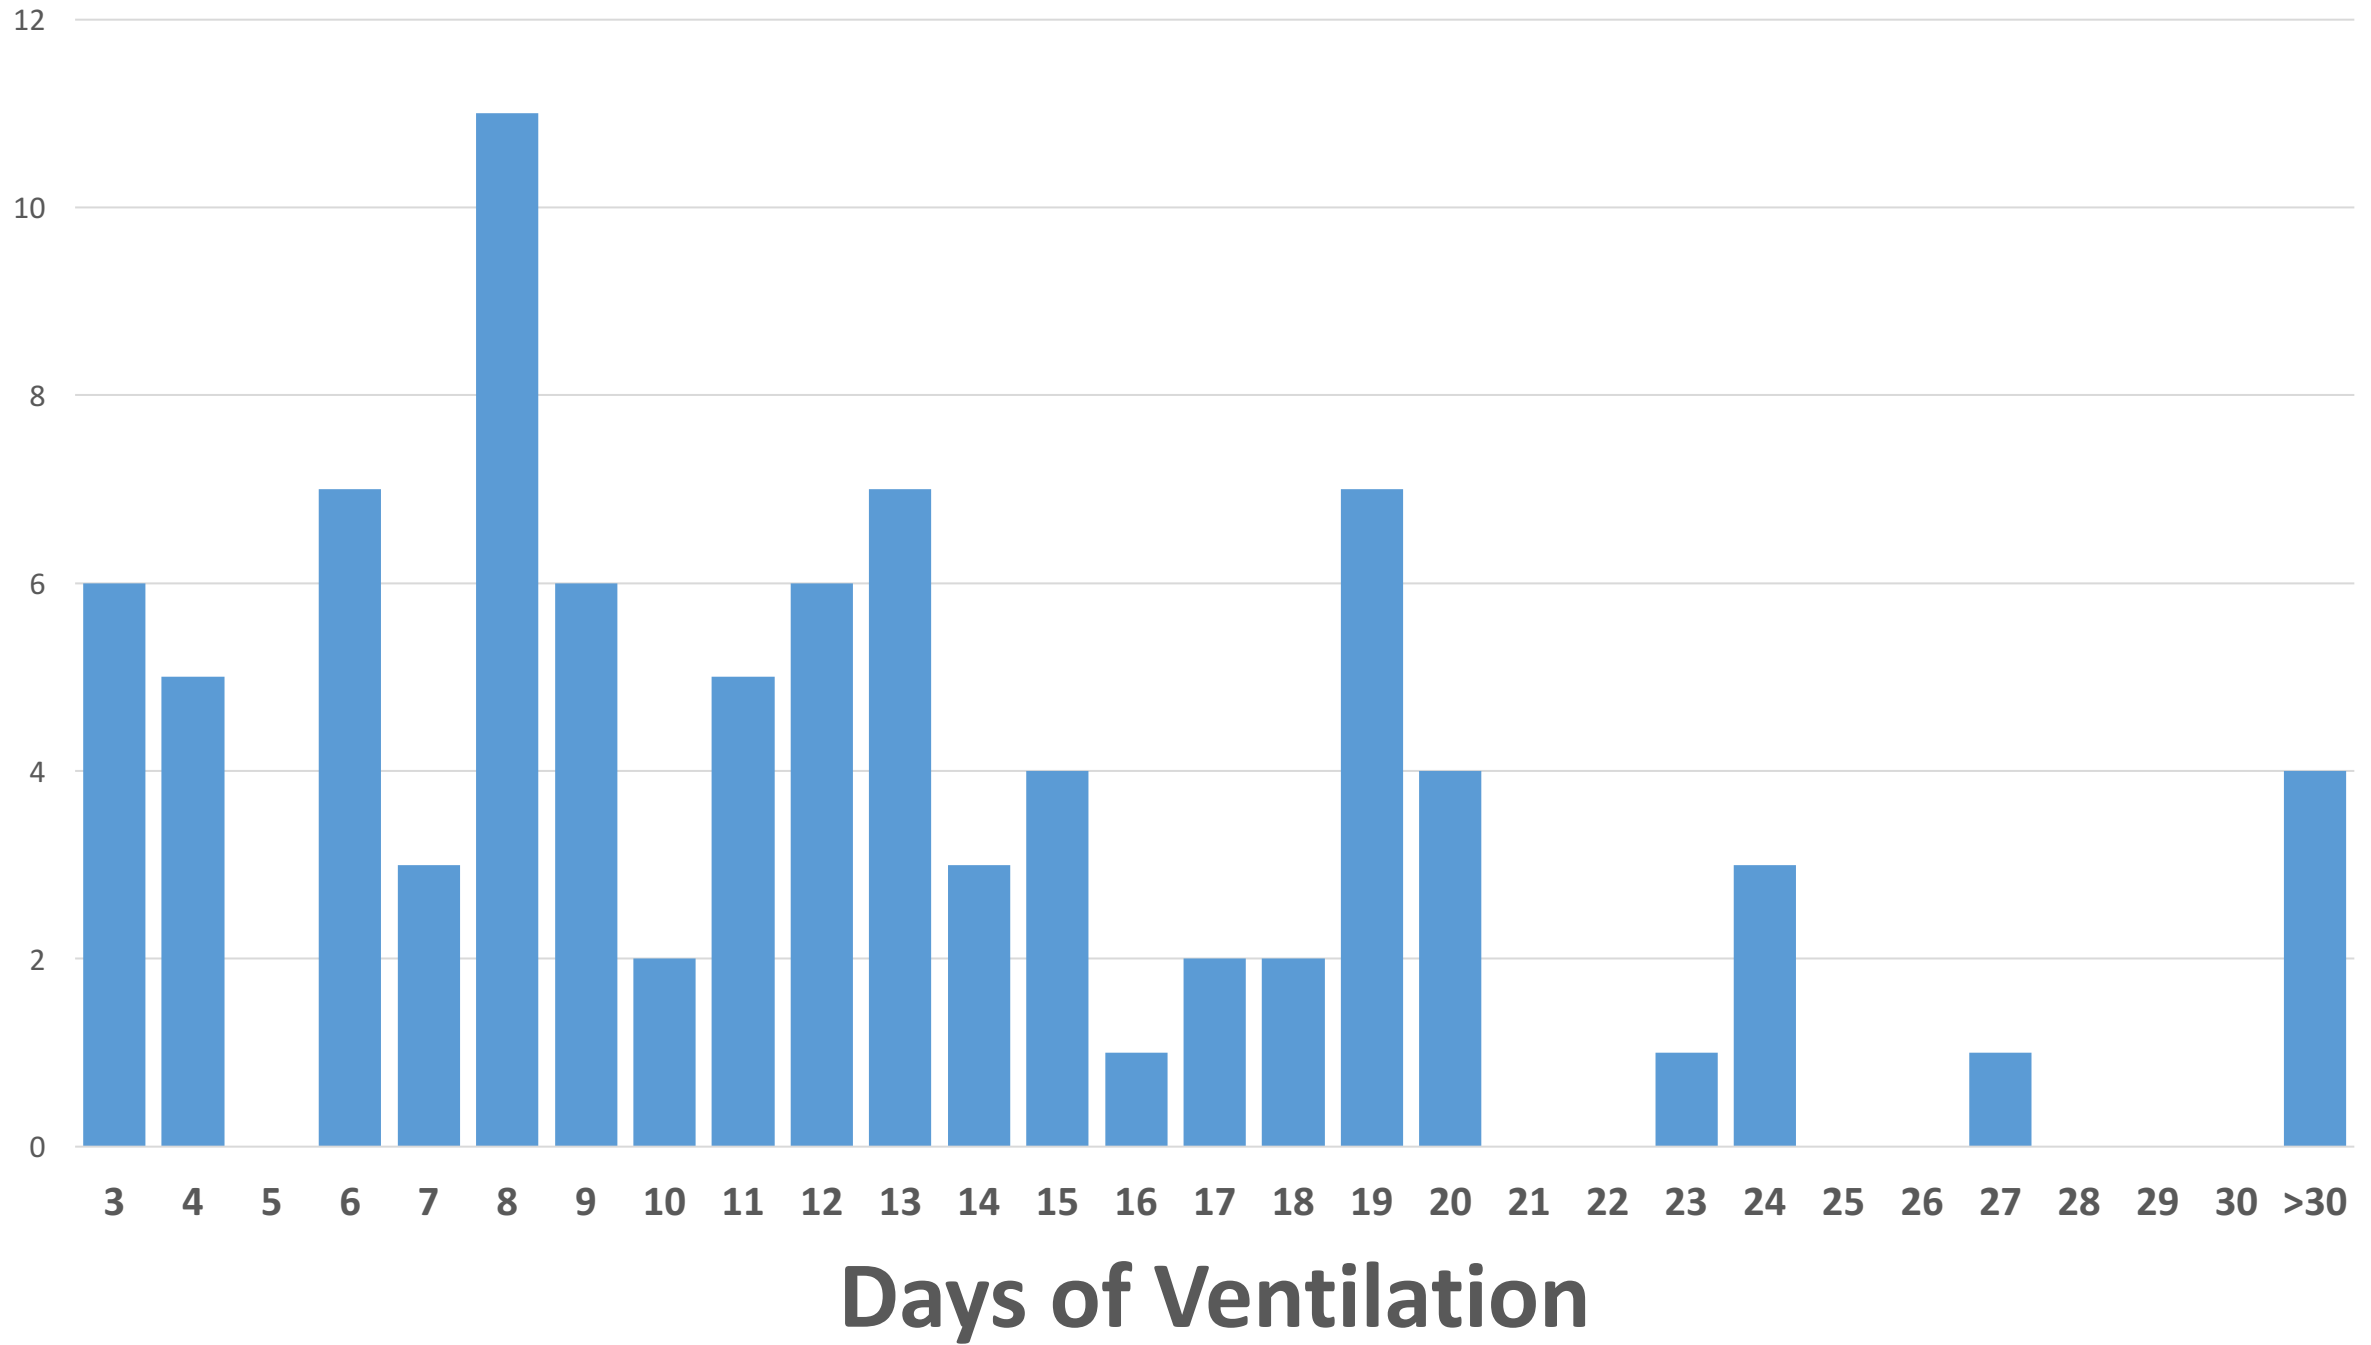

Supplement: Supplementary file [file media-3.pdf]
